# Supplementary material for: Altered intra- and inter-network connectivity in autism spectrum disorder
Source: publisher site journal article supplement (doi:10.18632/aging.205913), 2024-06-10
Supplement: Supplementary file [file aging-v16i11-205913-supplementary-material-SD1.pdf]

## SUPPLEMENTARY TABLE

**Supplementary Table 1. Brain regions and their abbreviations in AAL atlas.**

| <b>Labels</b> | <b>Abbreviations</b> | <b>Brain regions</b>                      |
|---------------|----------------------|-------------------------------------------|
| 1             | PrecentralL          | Precentral gyrus                          |
| 2             | PrecentralR          | Precentral gyrus                          |
| 3             | FrontalSupL          | Superior frontal gyrus, dorsolateral      |
| 4             | FrontalSupR          | Superior frontal gyrus, dorsolateral      |
| 5             | FrontalSupOrbL       | Superior frontal gyrus, orbital part      |
| 6             | FrontalSupOrbR       | Superior frontal gyrus, orbital part      |
| 7             | FrontalMidL          | Middle frontal gyrus                      |
| 8             | FrontalMidR          | Middle frontal gyrus                      |
| 9             | FrontalMidOrbL       | Middle frontal gyrus, orbital part        |
| 10            | FrontalMidOrbR       | Middle frontal gyrus, orbital part        |
| 11            | FrontalInfOperL      | Inferior frontal gyrus, opercular part    |
| 12            | FrontalInfOperR      | Inferior frontal gyrus, opercular part    |
| 13            | FrontalInfTriL       | Inferior frontal gyrus, triangular part   |
| 14            | FrontalInfTriR       | Inferior frontal gyrus, triangular part   |
| 15            | FrontalInfOrbL       | Inferior frontal gyrus, orbital part      |
| 16            | FrontalInfOrbR       | Inferior frontal gyrus, orbital part      |
| 17            | RolandicOperL        | Rolandic operculum                        |
| 18            | RolandicOperR        | Rolandic operculum                        |
| 19            | SuppMotorAreaL       | Supplementary motor area                  |
| 20            | SuppMotorAreaR       | Supplementary motor area                  |
| 21            | OlfactoryL           | Olfactory cortex                          |
| 22            | OlfactoryR           | Olfactory cortex                          |
| 23            | FrontalSupMedialL    | Superior frontal gyrus, medial            |
| 24            | FrontalSupMedialR    | Superior frontal gyrus, medial            |
| 25            | FrontalMidOrbL       | Superior frontal gyrus, medial orbital    |
| 26            | FrontalMidOrbR       | Superior frontal gyrus, medial orbital    |
| 27            | RectusL              | Gyrus rectus                              |
| 28            | RectusR              | Gyrus rectus                              |
| 29            | InsulaL              | Insula                                    |
| 30            | InsulaR              | Insula                                    |
| 31            | CingulumAntL         | Anterior cingulate and paracingulate gyri |
| 32            | CingulumAntR         | Anterior cingulate and paracingulate gyri |
| 33            | CingulumMidL         | Median cingulate and paracingulate gyri   |
| 34            | CingulumMidR         | Median cingulate and paracingulate gyri   |
| 35            | CingulumPostL        | Posterior cingulate gyrus                 |
| 36            | CingulumPostR        | Posterior cingulate gyrus                 |
| 37            | HippocampusL         | Hippocampus                               |
| 38            | HippocampusR         | Hippocampus                               |
| 39            | ParaHippocampalL     | Parahippocampal gyrus                     |
| 40            | ParaHippocampalR     | Parahippocampal gyrus                     |
| 41            | AmygdalaL            | Amygdala                                  |
| 42            | AmygdalaR            | Amygdala                                  |
| 43            | CalcarineL           | Calcarine fissure and surrounding cortex  |
| 44            | CalcarineR           | Calcarine fissure and surrounding cortex  |
| 45            | CuneusL              | Cuneus                                    |
| 46            | CuneusR              | Cuneus                                    |
| 47            | LingualL             | Lingual gyrus                             |
| 48            | LingualR             | Lingual gyrus                             |

|    |                    |                                                       |
|----|--------------------|-------------------------------------------------------|
| 49 | OccipitalSupL      | Superior occipital gyrus                              |
| 50 | OccipitalSupR      | Superior occipital gyrus                              |
| 51 | OccipitalMidL      | Middle occipital gyrus                                |
| 52 | OccipitalMidR      | Middle occipital gyrus                                |
| 53 | OccipitalInfL      | Inferior occipital gyrus                              |
| 54 | OccipitalInfR      | Inferior occipital gyrus                              |
| 55 | FusiformL          | Fusiform gyrus                                        |
| 56 | FusiformR          | Fusiform gyrus                                        |
| 57 | PostcentralL       | Postcentral gyrus                                     |
| 58 | PostcentralR       | Postcentral gyrus                                     |
| 59 | ParietalSupL       | Superior parietal gyrus                               |
| 60 | ParietalSupR       | Superior parietal gyrus                               |
| 61 | ParietalInfL       | Inferior parietal, but supramarginal and angular gyri |
| 62 | ParietalInfR       | Inferior parietal, but supramarginal and angular gyri |
| 63 | SupraMarginalL     | Supramarginal gyrus                                   |
| 64 | SupraMarginalR     | Supramarginal gyrus                                   |
| 65 | AngularL           | Angular gyrus                                         |
| 66 | AngularR           | Angular gyrus                                         |
| 67 | PrecuneusL         | Precuneus                                             |
| 68 | PrecuneusR         | Precuneus                                             |
| 69 | ParacentralLobuleL | Paracentral lobule                                    |
| 70 | ParacentralLobuleR | Paracentral lobule                                    |
| 71 | CaudateL           | Caudate nucleus                                       |
| 72 | CaudateR           | Caudate nucleus                                       |
| 73 | PutamenL           | Lenticular nucleus, putamen                           |
| 74 | PutamenR           | Lenticular nucleus, putamen                           |
| 75 | PallidumL          | Lenticular nucleus, pallidum                          |
| 76 | PallidumR          | Lenticular nucleus, pallidum                          |
| 77 | ThalamusL          | Thalamus                                              |
| 78 | ThalamusR          | Thalamus                                              |
| 79 | HeschlL            | Heschl gyrus                                          |
| 80 | HeschlR            | Heschl gyrus                                          |
| 81 | TemporalSupL       | Superior temporal gyrus                               |
| 82 | TemporalSupR       | Superior temporal gyrus                               |
| 83 | TemporalPoleSupL   | Temporal pole: superior temporal gyrus                |
| 84 | TemporalPoleSupR   | Temporal pole: superior temporal gyrus                |
| 85 | TemporalMidL       | Middle temporal gyrus                                 |
| 86 | TemporalMidR       | Middle temporal gyrus                                 |
| 87 | TemporalPoleMidL   | Temporal pole: middle temporal gyrus                  |
| 88 | TemporalPoleMidR   | Temporal pole: middle temporal gyrus                  |
| 89 | TemporalInfL       | Inferior temporal gyrus                               |
| 90 | TemporalInfR       | Inferior temporal gyrus                               |

Abbreviations: AAL, Anatomical Automatic Labeling.
